# Supplementary material for: Design and Implementation of a Genomics Field Trip Program Aimed at Secondary School Students
Source: PLOS journal article supplement (doi:10.1371/journal.pcbi.1002636), 2012-08-30
Supplement: S1 (10.1371/journal.pcbi.1002636.s001) [file journal.pcbi.1002636.s001]

**Table S1. Key Concepts Addressed by Activities in Genomics Field Trip Program.**

| Category                                 | Key Concepts <sup>1,2</sup>                                                                                                                                                                                                                                                                                                                                                                                                                                                                                                                                                                                                                                                                                                                                                                                                                                                                                                                                 | Activities                                                                                                                                                                                                                                                                                                                                                                                                                                                                                                                                                                                                                                                                                                                                                                                                                                                                                                                                                                                                                                              |
|------------------------------------------|-------------------------------------------------------------------------------------------------------------------------------------------------------------------------------------------------------------------------------------------------------------------------------------------------------------------------------------------------------------------------------------------------------------------------------------------------------------------------------------------------------------------------------------------------------------------------------------------------------------------------------------------------------------------------------------------------------------------------------------------------------------------------------------------------------------------------------------------------------------------------------------------------------------------------------------------------------------|---------------------------------------------------------------------------------------------------------------------------------------------------------------------------------------------------------------------------------------------------------------------------------------------------------------------------------------------------------------------------------------------------------------------------------------------------------------------------------------------------------------------------------------------------------------------------------------------------------------------------------------------------------------------------------------------------------------------------------------------------------------------------------------------------------------------------------------------------------------------------------------------------------------------------------------------------------------------------------------------------------------------------------------------------------|
| Process of Science                       | <ul style="list-style-type: none"> <li>• Demonstrate safe laboratory procedures and behavior.</li> <li>• Perform experiments using the scientific method.</li> <li>• Demonstrate scientific literacy.</li> <li>• Demonstrate ethical, responsible, co-operative behavior.</li> <li>• Describe the relationship between scientific principles and technology.</li> </ul>                                                                                                                                                                                                                                                                                                                                                                                                                                                                                                                                                                                     | <ol style="list-style-type: none"> <li>1. Graduate student instructors discuss their own research projects/interests</li> <li>2. Orientation to building</li> <li>3. Safety and rules</li> <li>5. Students extract DNA from cheek cells</li> <li>6. Students recognize a DNA precipitate</li> <li>8. Michael Smith - Nobel laureate quiz</li> <li>16. Students write questions about university life or careers in science that graduate student instructors answer</li> </ol>                                                                                                                                                                                                                                                                                                                                                                                                                                                                                                                                                                          |
| Nature of Genetic Material; Reproduction | <ul style="list-style-type: none"> <li>• DNA is the genetic material for all living organisms.</li> <li>• Genes are segments of DNA that encode information critical for development. DNA is organized into structures called chromosomes.</li> <li>• Identify chromosomes, nucleotides, base pairs, sugar-phosphate backbone, double helix, centromere, nucleus, cell membrane, nuclear membrane.</li> <li>• The genome is all the genetic information within an organism.</li> <li>• The amount of genetic information within an organism is not a product of size or complexity.</li> <li>• Genome sequencing involves producing and organizing short overlapping DNA sequences.</li> <li>• Humans receive half their genetic information from each parent through the processes of replication, meiosis and fertilization.</li> <li>• Relate the processes of cell division and emerging reproductive technologies to embryonic development.</li> </ul> | <ol style="list-style-type: none"> <li>4. Presentation/ Discuss components of DNA and DNA extraction</li> <li>5. Students extract DNA from cheek cells</li> <li>6. Students recognize a DNA precipitate</li> <li>7. Students label DNA drawing and list reagents used in DNA extraction</li> <li>9. Students perform online searches to define genome, sequencing and the Human Genome Project (HGP)</li> <li>10. Class discuss answers to HGP definitions</li> <li>11. Students watch video about the HGP</li> <li>12. As groups of 4-6, students race to put in order overlapping short DNA sequences</li> <li>17. Watch video that introduces controversies within the field of human genomics</li> <li>18. Students read through personal genomics controversies worksheet</li> <li>19. Answer personal genomics questions in groups 4-6</li> <li>20. Students watch video regarding human reproduction (pre-implantation diagnosis)</li> <li>21. Read through hand out and discuss pre-implantation diagnosis questions in small groups</li> </ol> |
| Gene Expression and Regulation           | <ul style="list-style-type: none"> <li>• Genes exist in different forms called alleles.</li> <li>• The expression of genetic information generally flows from DNA to RNA to protein. This occurs through transcription of DNA into RNA and translation of mRNA into protein.</li> <li>• Virtually all cells within a human body contain the same genetic information.</li> <li>• For traits primarily influenced by single genes, certain combinations of alleles lead to predictable patterns of inheritance. Other more complex traits involve the influence of multiple genes.</li> <li>• The functions of genes and their products can be affected by the environment and other genes at one or many steps involved in producing a trait.</li> </ul>                                                                                                                                                                                                    | <ol style="list-style-type: none"> <li>9. Students perform online searches to define genome, sequencing and the HGP</li> <li>10. Class discuss answers to HGP definitions</li> <li>11. Students watch video about the HGP</li> <li>12. As groups of 4-6, students race to put in order overlapping short DNA sequences</li> <li>13. Class discuss and watch video about transcription and translation</li> <li>14. Students transcribe and translate the short DNA sequence</li> <li>15. Presentation and questions regarding the role of environment and genotype of phenotype</li> </ol>                                                                                                                                                                                                                                                                                                                                                                                                                                                              |

Key Concepts adapted from:

<sup>1</sup> B.C. Ministry of Education. Grade 9 Curriculum Package, online. [www.bced.gov.bc.ca/irp](http://www.bced.gov.bc.ca/irp) [April 11, 2012]

<sup>2</sup> Dougherty M, Pleasants C, Solow L, Wong A, et al. (2011) A Comprehensive analysis of High School Genetics Standards: Are States Keeping Pace with Modern Genetics? CBE- Life Sciences Education (10): 318-327.
